# Supplementary material for: Evaluation of gliovascular functions of AQP4 readthrough isoforms
Source: PubMed Central journal article supplement (PMC10701521; doi:10.3389/fncel.2023.1272391), 2023-11-23
Supplement: Image_2.pdf [file Image_2.pdf]

## **SUPPLEMENTARY MATERIAL**

### **Evaluation of gliovascular functions of Aqp4 readthrough isoforms**

Shayna M. Mueller<sup>\*1,2</sup>, Kelli McFarland White<sup>\*1,2</sup>, Stuart B. Fass<sup>1,2</sup>, Siyu Chen<sup>1,2,3</sup>, Zhan Shi<sup>4</sup>, Xia Ge<sup>3,6</sup>, John A. Engelbach<sup>3,6</sup>, Seana H Gaines<sup>3</sup>, Annie R Bice<sup>3</sup>, Michael J. Vasek<sup>1,2</sup>, Joel R. Garbow<sup>3,6</sup>, Joseph P. Culver<sup>3,7,8,9,10</sup>, Zila Martinez-Lozada<sup>11</sup>, Martine Cohen-Salmon<sup>12</sup>, Joseph D. Dougherty<sup>++1,2,6</sup>, Darshan Sapkota<sup>+++4,5</sup>

A)

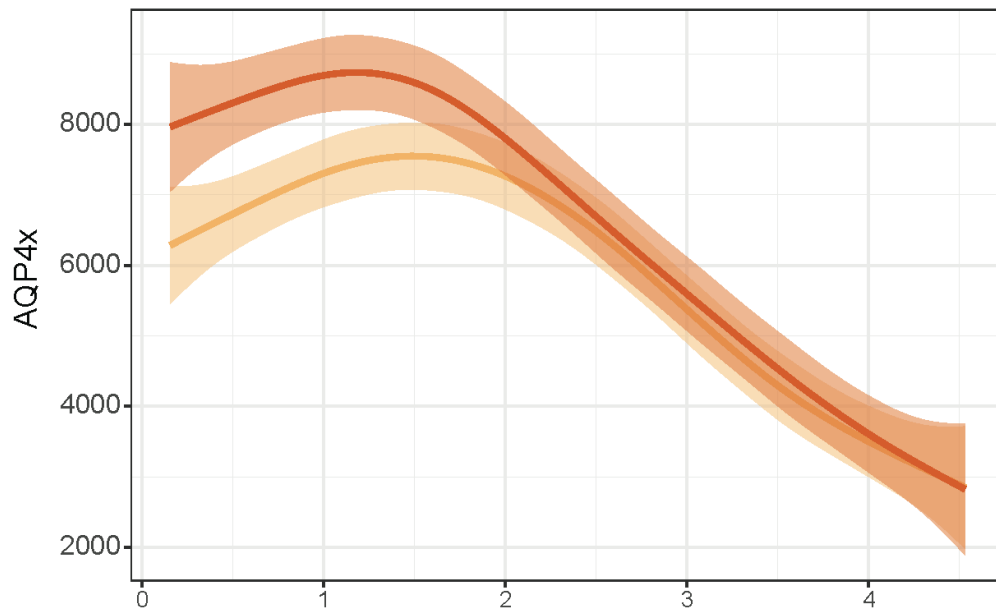

B)

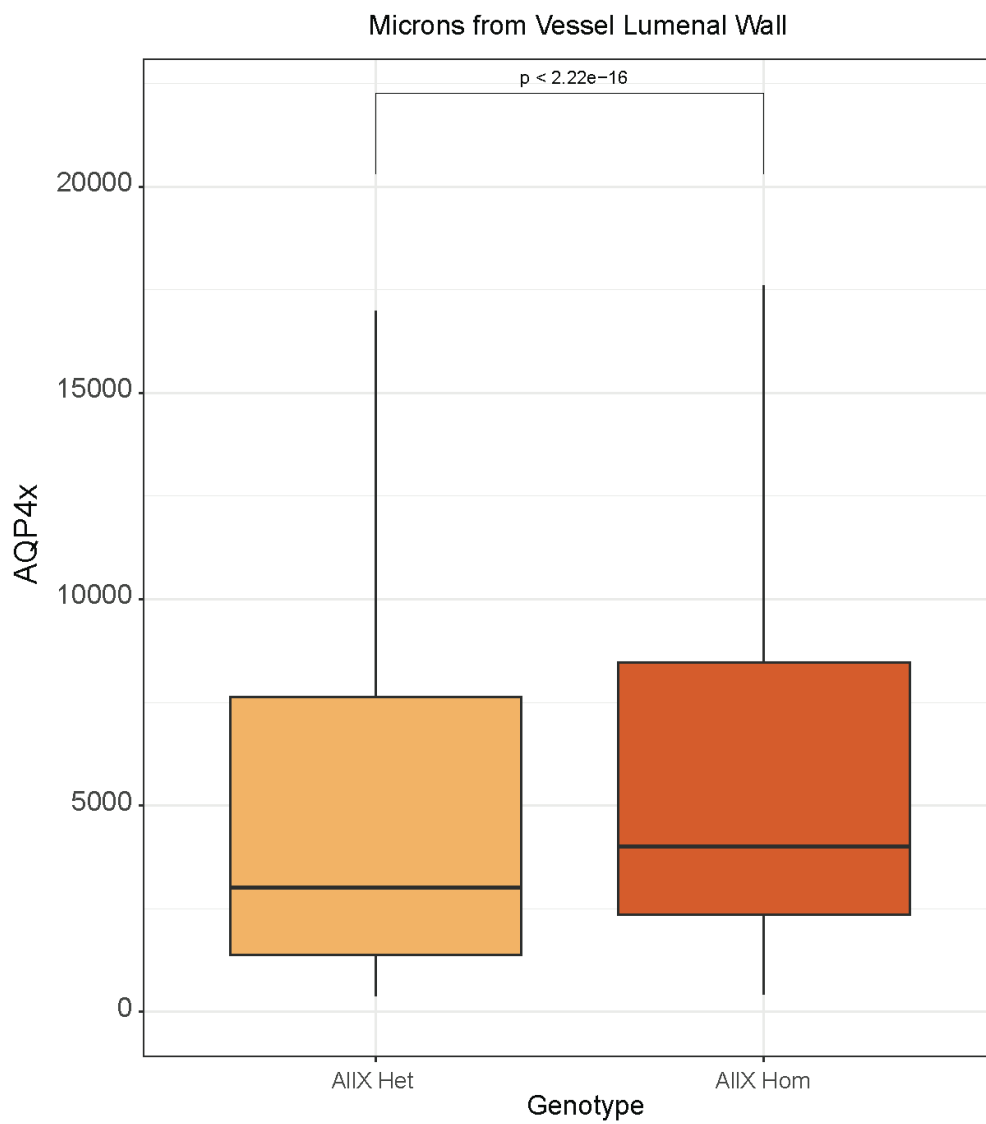

**Supplemental Figure 2: Reimaging with no AQP4x saturation indicates modest but significant differences between  $AIIX^{Hom}$  and  $AIIX^{Het}$**  **A)** Loess curve fit to distribution of AQP4x fluorescent signal. **B)** Boxplot with outliers not shown depicts perivascular AQP4x levels are slightly higher in  $AIIX^{Hom}$  genotype, significant p value  $< 2.22e-16$  by wilcox test.
