# Supplementary material for: Evaluation of gliovascular functions of AQP4 readthrough isoforms
Source: PubMed Central journal article supplement (PMC10701521; doi:10.3389/fncel.2023.1272391), 2023-11-23
Supplement: Image_4.pdf [file Image_4.pdf]

## **SUPPLEMENTARY MATERIAL**

### **Evaluation of gliovascular functions of Aqp4 readthrough isoforms**

Shayna M. Mueller<sup>\*1,2</sup>, Kelli McFarland White<sup>\*1,2</sup>, Stuart B. Fass<sup>1,2</sup>, Siyu Chen<sup>1,2,3</sup>, Zhan Shi<sup>4</sup>, Xia Ge<sup>3,6</sup>, John A. Engelbach<sup>3,6</sup>, Seana H Gaines<sup>3</sup>, Annie R Bice<sup>3</sup>, Michael J. Vasek<sup>1,2</sup>, Joel R. Garbow<sup>3,6</sup>, Joseph P. Culver<sup>3,7,8,9,10</sup>, Zila Martinez-Lozada<sup>11</sup>, Martine Cohen-Salmon<sup>12</sup>, Joseph D. Dougherty<sup>++1,2,6</sup>, Darshan Sapkota<sup>+++4,5</sup>

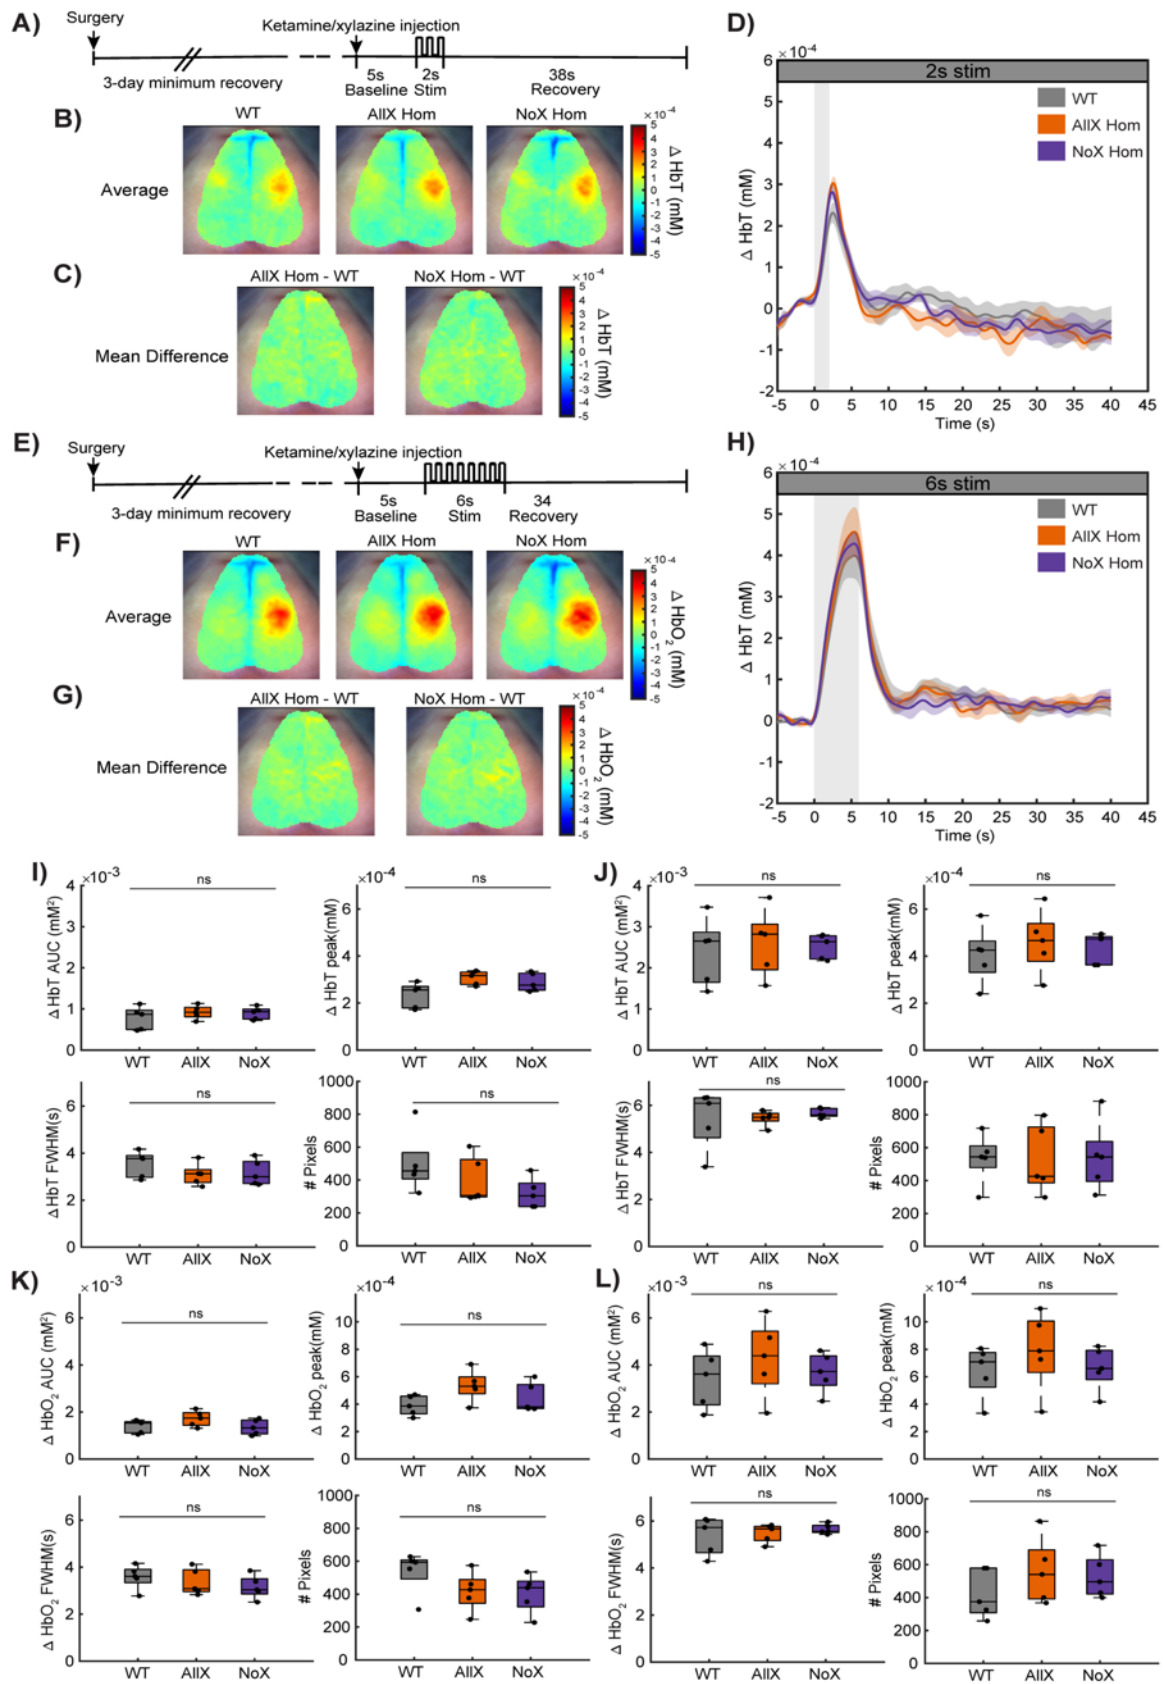

**Supplemental Figure 4. Hemodynamic response to somatosensory stimuli is not altered in AllX<sup>Hom</sup> or NoX<sup>Hom</sup> mice.** **A)** Schematic of 2s left forepaw electrical stimulation paradigm. **B)** Mean total hemoglobin (HbT) response maps to 2s forepaw stimulus for WT (n=5 mice, n=15 runs), AllX<sup>Hom</sup> (n=5 mice, 14 runs) and NoX<sup>Hom</sup> (n=5 mice, n=15 runs) mice comparing the time period 1-6s post-stimuli onset to baseline. **C)** Mean difference between AllX and WT maps (AllX<sup>Hom</sup>-WT) and between NoX<sup>Hom</sup> and WT maps

(NoX<sup>Hom</sup>-WT). **D**) Mean HbT response time courses for the same groups. Time courses were extracted from pixels that reached  $\geq 50\%$  of the max peak response in each group. *Shading depicts SEM.* **E**) Schematic of 6s left forepaw electrical stimulation paradigm. **F**) Mean HbT response maps to 6s forepaw stimulus for WT (n=5 mice, 25 runs, AIIX (n=5 mice, 20 runs) and NoX (n=5 mice, 20 runs) mice comparing the time period 0-6s post-stimuli onset to baseline. **G**) Mean difference between AIIX and WT maps (AIIX<sup>Hom</sup>-WT) and between NoX and WT maps (NoX<sup>Hom</sup>-WT). **H**) Mean HbT response time courses for the same groups. Time courses were extracted from pixels that reached  $\geq 50\%$  of the peak response in each group. *Shading depicts SEM* **I**) Analysis of HbT response parameters to 2s stim, including area under the curve (AUC), peak response amplitudes, full-width half-maximum (FWHM), and number of pixels reached  $\geq 50\%$  max response amplitude. **J**) Analysis of HbT response parameters to 6s stim. **K**) Analysis of oxyhemoglobin (HbO<sub>2</sub>) response parameters to 2s stim. **L**) Analysis of HbO<sub>2</sub> response parameters to 6s stim. ns = not significant by one-way ANOVA.
