# Supplementary material for: Evaluation of gliovascular functions of AQP4 readthrough isoforms
Source: PubMed Central journal article supplement (PMC10701521; doi:10.3389/fncel.2023.1272391), 2023-11-23
Supplement: Image_5.pdf [file Image_5.pdf]

## SUPPLEMENTARY MATERIAL

### Evaluation of gliovascular functions of Aqp4 readthrough isoforms

Shayna M. Mueller<sup>\*1,2</sup>, Kelli McFarland White<sup>\*1,2</sup>, Stuart B. Fass<sup>1,2</sup>, Siyu Chen<sup>1,2,3</sup>, Zhan Shi<sup>4</sup>, Xia Ge<sup>3,6</sup>, John A. Engelbach<sup>3,6</sup>, Seana H Gaines<sup>3</sup>, Annie R Bice<sup>3</sup>, Michael J. Vasek<sup>1,2</sup>, Joel R. Garbow<sup>3,6</sup>, Joseph P. Culver<sup>3,7,8,9,10</sup>, Zila Martinez-Lozada<sup>11</sup>, Martine Cohen-Salmon<sup>12</sup>, Joseph D. Dougherty<sup>++1,2,6</sup>, Darshan Sapkota<sup>++4,5</sup>

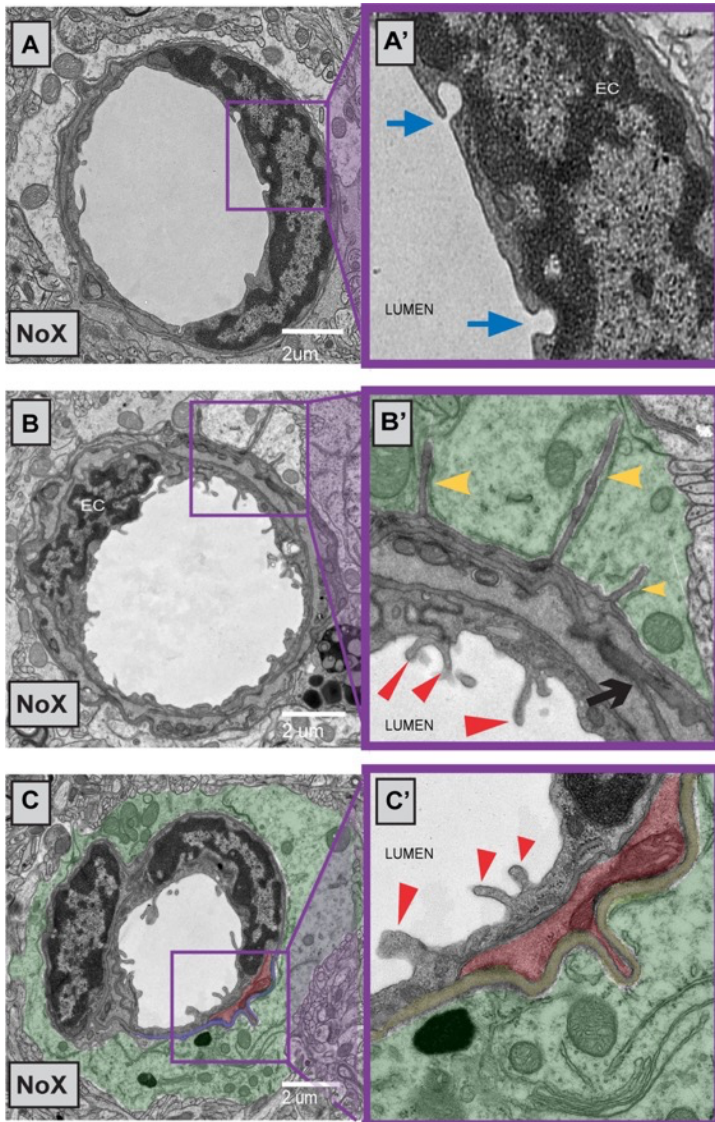

**Supplemental Figure 5. Cortical vasculature ultrastructural morphology largely unchanged in AQP4 readthrough mutants.** **A-C)** Representative EM images of NoX blood vessels depicting quantified ultrastructures. **A' inset) Budding** endothelial cell vesicles (blue arrows). **B' inset) endfoot** (light green), basal lamina "projections without contents" (yellow arrowheads), microvilli (red triangles), lamina branching (black arrow). **C' inset) microvilli** (red triangles), endfoot (light green), basal lamina "projection with contents" (red, presumed pericytes).
