# Supplementary material for: Evaluation of gliovascular functions of AQP4 readthrough isoforms
Source: PubMed Central journal article supplement (PMC10701521; doi:10.3389/fncel.2023.1272391), 2023-11-23
Supplement: Table_1.pdf [file Table_1.pdf]

## SUPPLEMENTARY MATERIAL

### Evaluation of gliovascular functions of Aqp4 readthrough isoforms

Shayna M. Mueller<sup>\*1,2</sup>, Kelli McFarland White<sup>\*1,2</sup>, Stuart B. Fass<sup>1,2</sup>, Siyu Chen<sup>1,2,3</sup>, Zhan Shi<sup>4</sup>, Xia Ge<sup>3,6</sup>, John A. Engelbach<sup>3,6</sup>, Seana H Gaines<sup>3</sup>, Annie R Bice<sup>3</sup>, Michael J. Vasek<sup>1,2</sup>, Joel R. Garbow<sup>3,6</sup>, Joseph P. Culver<sup>3,7,8,9,10</sup>, Zila Martinez-Lozada<sup>11</sup>, Martine Cohen-Salmon<sup>12</sup>, Joseph D. Dougherty<sup>++1,2,6</sup>, Darshan Sapkota<sup>++4,5</sup>

**Supplemental Table 1: IF statistical summary**

|                      | <b>AllX Het</b><br>(n = 2236,<br>Mice = 5) | <b>AllX Hom</b><br>(n = 2177,<br>Mice = 5) | <b>KO</b><br>(n = 1174,<br>Mice = 5) | <b>NoX Het</b><br>(n = 1220,<br>Mice = 5) | <b>NoX Hom</b><br>(n = 1274,<br>Mice = 5) | <b>WT</b><br>(n = 2018,<br>Mice = 5) | <b>Total</b><br>(n = 10099,<br>Mice = 30) |
|----------------------|--------------------------------------------|--------------------------------------------|--------------------------------------|-------------------------------------------|-------------------------------------------|--------------------------------------|-------------------------------------------|
| <b>CD31</b>          |                                            |                                            |                                      |                                           |                                           |                                      |                                           |
| Mean (SD)            | 7560<br>(4730)                             | 8490<br>(4960)                             | 9900<br>(6410)                       | 11000<br>(5800)                           | 11500<br>(6510)                           | 10900<br>(6210)                      | 9600 (5860)                               |
| Median<br>[Min, Max] | 6450 [645,<br>32900]                       | 7430 [827,<br>30100]                       | 8210 [1100,<br>41400]                | 9970 [1370,<br>42600]                     | 10700<br>[1090,<br>35200]                 | 9680 [772,<br>42300]                 | 8380 [645,<br>42600]                      |
| <b>AQP4</b>          |                                            |                                            |                                      |                                           |                                           |                                      |                                           |
| Mean (SD)            | 8810<br>(8380)                             | 9660<br>(9400)                             | 2280<br>(2710)                       | 5060<br>(4790)                            | 3140 (3440)                               | 10100<br>(8950)                      | 6950 (7810)                               |
| Median<br>[Min, Max] | 6170 [304,<br>54500]                       | 6970 [78.9,<br>56900]                      | 1270 [136,<br>18700]                 | 3500 [358,<br>41400]                      | 1600 [275,<br>27500]                      | 7370 [349,<br>47900]                 | 3940 [78.9,<br>56900]                     |
| Missing              | 465<br>(20.8%)                             | 546<br>(25.1%)                             | 0 (0%)                               | 0 (0%)                                    | 0 (0%)                                    | 465 (23.0%)                          | 1476 (14.6%)                              |
| <b>AQP4x</b>         |                                            |                                            |                                      |                                           |                                           |                                      |                                           |
| Mean (SD)            | 22100<br>(12900)                           | 20800<br>(11800)                           | 928 (445)                            | 6440<br>(4620)                            | 992 (357)                                 | 17300<br>(10100)                     | 14000 (12700)                             |
| Median<br>[Min, Max] | 21900 [616,<br>61500]                      | 20400 [600,<br>59700]                      | 877 [223,<br>5760]                   | 5840 [354,<br>25700]                      | 964 [170,<br>5620]                        | 16000<br>[90.3,<br>54600]            | 11400 [90.3,<br>61500]                    |
| Missing              | 1121<br>(50.1%)                            | 1083<br>(49.7%)                            | 624<br>(53.2%)                       | 563<br>(46.1%)                            | 637 (50.0%)                               | 838 (41.5%)                          | 4866 (48.2%)                              |
| <b>α-syn</b>         |                                            |                                            |                                      |                                           |                                           |                                      |                                           |
| Mean (SD)            | 8000<br>(4850)                             | 6700<br>(4580)                             | 2740<br>(1750)                       | 3630<br>(1990)                            | 2670 (1270)                               | 3960 (2410)                          | 4730 (3850)                               |
| Median<br>[Min, Max] | 6930 [710,<br>32700]                       | 5530 [670,<br>31800]                       | 2260 [487,<br>9530]                  | 3180 [538,<br>13200]                      | 2460 [506,<br>11200]                      | 3520 [671,<br>16200]                 | 3520 [487,<br>32700]                      |
| Missing              | 1520<br>(68.0%)                            | 1596<br>(73.3%)                            | 550<br>(46.8%)                       | 657<br>(53.9%)                            | 637 (50.0%)                               | 1591<br>(78.8%)                      | 6551 (64.9%)                              |
