# Supplementary material for: Evaluation of gliovascular functions of AQP4 readthrough isoforms
Source: PubMed Central journal article supplement (PMC10701521; doi:10.3389/fncel.2023.1272391), 2023-11-23
Supplement: Table_2.pdf [file Table_2.pdf]

## SUPPLEMENTARY MATERIAL

### Evaluation of gliovascular functions of Aqp4 readthrough isoforms

Shayna M. Mueller<sup>\*1,2</sup>, Kelli McFarland White<sup>\*1,2</sup>, Stuart B. Fass<sup>1,2</sup>, Siyu Chen<sup>1,2,3</sup>, Zhan Shi<sup>4</sup>, Xia Ge<sup>3,6</sup>, John A. Engelbach<sup>3,6</sup>, Seana H Gaines<sup>3</sup>, Annie R Bice<sup>3</sup>, Michael J. Vasek<sup>1,2</sup>, Joel R. Garbow<sup>3,6</sup>, Joseph P. Culver<sup>3,7,8,9,10</sup>, Zila Martinez-Lozada<sup>11</sup>, Martine Cohen-Salmon<sup>12</sup>, Joseph D. Dougherty<sup>++1,2,6</sup>, Darshan Sapkota<sup>+++4,5</sup>

**Supplemental Table 2: Statistical summary, n, and mean differences for all electron microscopy analyses.**

Preliminary

|                                                                           | WT<br>(N=35)       | NoX<br>Hom<br>(N=41) | AllX<br>Hom<br>(N=41) | Total<br>(N=117)   | Model /<br>Statistical<br>Test | P value |
|---------------------------------------------------------------------------|--------------------|----------------------|-----------------------|--------------------|--------------------------------|---------|
| <b>Basal Lamina Projections with Contents (#) (presumptive pericytes)</b> |                    |                      |                       |                    | genotype + (1 mouse_ID/G rid)  | 0.751   |
| Mean (SD)                                                                 | 0.229 (0.877)      | 0.220 (0.525)        | 0.0976 (0.436)        | 0.179 (0.624)      |                                |         |
| Median [Min, Max]                                                         | 0 [0, 5.00]        | 0 [0, 2.00]          | 0 [0, 2.00]           | 0 [0, 5.00]        |                                |         |
| <b>Widest endfoot radial (um)</b>                                         |                    |                      |                       |                    | genotype + (1 mouse_ID/G rid)  | 0.5282  |
| Mean (SD)                                                                 | 2.13 (1.67)        | 2.21 (1.84)          | 1.60 (1.22)           | 1.97 (1.60)        |                                |         |
| Median [Min, Max]                                                         | 1.60 [0.336, 7.95] | 1.59 [0.211, 7.79]   | 1.29 [0.121, 6.38]    | 1.54 [0.121, 7.95] |                                |         |
| <b>Widest endfoot tangential (um)</b>                                     |                    |                      |                       |                    | genotype + (1 mouse_ID/G rid)  | 0.5282  |
| Mean (SD)                                                                 | 6.63 (3.93)        | 5.42 (2.74)          | 4.78 (1.93)           | 5.55 (3.00)        |                                |         |
| Median [Min, Max]                                                         | 5.14 [2.90, 18.4]  | 4.99 [1.05, 12.8]    | 4.46 [0.526, 9.97]    | 4.79 [0.526, 18.4] |                                |         |
| <b>Basal Lamina projections without Contents (#)</b>                      |                    |                      |                       |                    | genotype + (1 mouse_ID/G rid)  | 0.1831  |
| Mean (SD)                                                                 | 0.771 (2.41)       | 0.488 (1.45)         | 0.0488 (0.218)        | 0.419 (1.59)       |                                |         |
| Median [Min, Max]                                                         | 0 [0, 10.0]        | 0 [0, 6.00]          | 0 [0, 1.00]           | 0 [0, 10.0]        |                                |         |
| <b>Thick basal lamina (Yes / No)</b>                                      |                    |                      |                       |                    | genotype + (1 mouse_ID)        | 0.953   |
| No                                                                        | 15 (42.9%)         | 19 (46.3%)           | 19 (46.3%)            | 53 (45.3%)         |                                |         |
| Yes                                                                       | 20 (57.1%)         | 22 (53.7%)           | 22 (53.7%)            | 64 (54.7%)         |                                |         |

|                                                |                |                |                |                |                               |        |
|------------------------------------------------|----------------|----------------|----------------|----------------|-------------------------------|--------|
| <b>lamina branching (Yes / No)</b>             |                |                |                |                | genotype + (1 mouse_ID)       | 0.2132 |
| No                                             | 1 (2.9%)       | 7 (17.1%)      | 5 (12.2%)      | 13 (11.1%)     |                               |        |
| Yes                                            | 34 (97.1%)     | 34 (82.9%)     | 36 (87.8%)     | 104 (88.9%)    |                               |        |
| <b>Microvilli (#)</b>                          |                |                |                |                | genotype + (1 mouse_ID/G rid) | 0.1396 |
| Mean (SD)                                      | 5.11 (6.21)    | 4.71 (6.63)    | 2.32 (2.23)    | 3.99 (5.45)    |                               |        |
| Median [Min, Max]                              | 2.00 [0, 24.0] | 3.00 [0, 38.0] | 2.00 [0, 9.00] | 2.00 [0, 38.0] |                               |        |
| <b>Budding Endothelial Vesicles (Yes / No)</b> |                |                |                |                | genotype + (1 mouse_ID)       | 0.2915 |
| No                                             | 12 (34.3%)     | 15 (36.6%)     | 9 (22.0%)      | 36 (30.8%)     |                               |        |
| Yes                                            | 23 (65.7%)     | 26 (63.4%)     | 32 (78.0%)     | 81 (69.2%)     |                               |        |

#### Replication

|                                                            | <b>WT<br/>(Mice = 4,<br/>Vessels =117)</b> | <b>NoX Hom<br/>(Mice = 4,<br/>Vessels=119)</b> | <b>AllX Hom<br/>(Mice = 4,<br/>Vessels=115)</b> | <b>Total<br/>(Mice = 12,<br/>Vessels= 351)</b> | <b>Model /<br/>Statistical<br/>Test</b>                                 | <b>P value</b> |
|------------------------------------------------------------|--------------------------------------------|------------------------------------------------|-------------------------------------------------|------------------------------------------------|-------------------------------------------------------------------------|----------------|
| <b>Microvilli (#)</b>                                      |                                            |                                                |                                                 |                                                | genotype + (1 mouse_ID)                                                 | 0.1536         |
| Mean (SD)                                                  | 2.47 (3.85)                                | 1.82 (2.48)                                    | 1.57 (2.09)                                     | 1.96 (2.93)                                    |                                                                         |                |
| Median [Min, Max]                                          | 1.00 [0, 20.0]                             | 1.00 [0, 19.0]                                 | 1.00 [0, 13.0]                                  | 1.00 [0, 20.0]                                 |                                                                         |                |
| <b>Number of Basal Lamina projections without Contents</b> |                                            |                                                |                                                 |                                                | genotype + (1 mouse_ID)                                                 | 0.1886         |
| Mean (SD)                                                  | 0.111 (0.728)                              | 0.00840 (0.0917)                               | 0.0435 (0.244)                                  | 0.0541 (0.447)                                 |                                                                         |                |
| Median [Min, Max]                                          | 0 [0, 7.00]                                | 0 [0, 1.00]                                    | 0 [0, 2.00]                                     | 0 [0, 7.00]                                    |                                                                         |                |
| <b>Budding Endothelial Vesicles</b>                        |                                            |                                                |                                                 |                                                | 3-sample test for equality of proportions without continuity correction | 0.01468        |
| No                                                         | 63 (53.8%)                                 | 53 (44.5%)                                     | 73 (63.5%)                                      | 189 (53.8%)                                    |                                                                         |                |
| Yes                                                        | 54 (46.2%)                                 | 66 (55.5%)                                     | 42 (36.5%)                                      | 162 (46.2%)                                    |                                                                         |                |
